# Supplementary material for: Construction and Characterization of a Cellulolytic Consortium Enriched from the Hindgut of Holotrichia parallela Larvae
Source: PubMed Central journal article supplement (PMC5085679; doi:10.3390/ijms17101646), 2016-09-30
Supplement: ijms-17-01646-s001.pdf [file ijms-17-01646-s001.pdf]

# Supplementary Materials: Construction and Characterization of a Cellulolytic Consortium Enriched from the Hindgut of *Holotrichia parallela* Larvae

Ping Sheng, Jiangli Huang, Zhihong Zhang, Dongsheng Wang, Xiaojuan Tian and Jiannan Ding

**Table S1.** Bacterial compositions and comparative analysis of these bacteria (phylum level).

| Taxa           | Relative Abundance<br>%(OM Group) | Relative Abundance<br>%(MM Group) | Relative Abundance<br>%(FM Group) | <i>p</i> Value<br>(OM vs.<br>MM) | <i>p</i> Value<br>(MM vs.<br>FM) | <i>p</i> Value<br>(OM vs.<br>FM) |
|----------------|-----------------------------------|-----------------------------------|-----------------------------------|----------------------------------|----------------------------------|----------------------------------|
| Bacteroidetes  | 54.32                             | 24.93                             | 20.73                             | 0.006                            | 0.130                            | 0.005                            |
| Proteobacteria | 9.13                              | 30.68                             | 46.05                             | 0.012                            | 0.013                            | 0.005                            |
| Spirochaetes   | 1.85                              | 11.32                             | 4.77                              | 0.036                            | 0.078                            | 0.083                            |

**Table S2.** Bacterial compositions and comparative analysis of these bacteria (class level).

| Taxa                  | Relative Abundance<br>%(OM Group) | Relative Abundance<br>%(MM Group) | Relative Abundance<br>%(FM Group) | <i>p</i> Value<br>(OM vs.<br>MM) | <i>p</i> Value<br>(MM vs.<br>FM) | <i>p</i> Value<br>(OM vs.<br>FM) |
|-----------------------|-----------------------------------|-----------------------------------|-----------------------------------|----------------------------------|----------------------------------|----------------------------------|
| Bacteroidia           | 54.14                             | 24.05                             | 19.02                             | 0.005                            | 0.134                            | 0.001                            |
| Clostridia            | 20.87                             | 28.38                             | 22.52                             | 0.036                            | 0.102                            | 0.718                            |
| Betaproteobacteria    | 1.69                              | 16.22                             | 17.73                             | 0.001                            | 0.636                            | 0.023                            |
| Epsilonproteobacteria | 0.40                              | 4.21                              | 16.48                             | 0.026                            | 0.052                            | 0.011                            |
| Spirochaetes          | 1.83                              | 11.09                             | 4.42                              | 0.041                            | 0.067                            | 0.118                            |
| Bacilli               | 5.45                              | 2.48                              | 2.69                              | 0.048                            | 0.869                            | 0.019                            |

**Table S3.** Bacterial compositions and comparative analysis of these bacteria (genus level).

| Taxa                 | Relative Abundance<br>%(OM Group) | Relative Abundance<br>%(MM Group) | Relative Abundance<br>%(FM Group) | <i>p</i> Value<br>(OM vs.<br>MM) | <i>p</i> Value<br>(MM vs.<br>FM) | <i>p</i> Value<br>(OM vs.<br>FM) |
|----------------------|-----------------------------------|-----------------------------------|-----------------------------------|----------------------------------|----------------------------------|----------------------------------|
| <i>Prevotella</i>    | 13.85                             | 3.65                              | 1.40                              | 0.006                            | 0.001                            | 0.003                            |
| <i>Comamonas</i>     | 0.82                              | 9.51                              | 5.83                              | 0.005                            | 0.153                            | 0.041                            |
| <i>Arcobacter</i>    | 0.40                              | 4.20                              | 16.47                             | 0.015                            | 0.064                            | 0.033                            |
| <i>Treponema</i>     | 0.29                              | 10.82                             | 3.89                              | 0.026                            | 0.084                            | 0.040                            |
| <i>Clostridium</i>   | 1.01                              | 3.66                              | 2.69                              | 0.049                            | 0.478                            | 0.013                            |
| <i>Lactobacillus</i> | 2.66                              | 1.38                              | 0.81                              | 0.147                            | 0.582                            | 0.007                            |

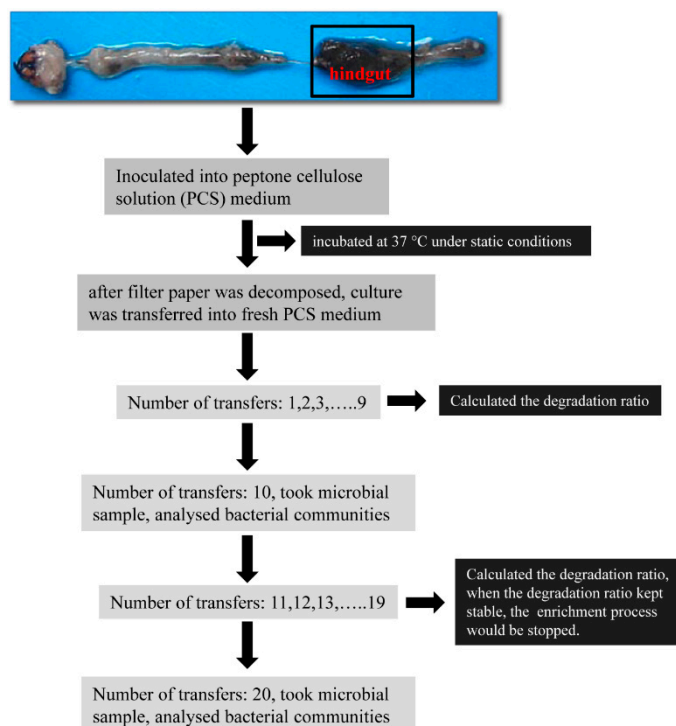

Figure S1. Image of the enrichment method.

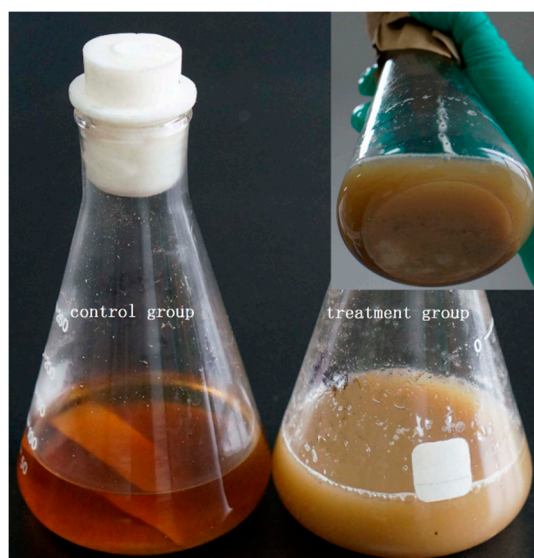

Figure S2. Picture of decomposed filter paper after 3 days of cultivation.

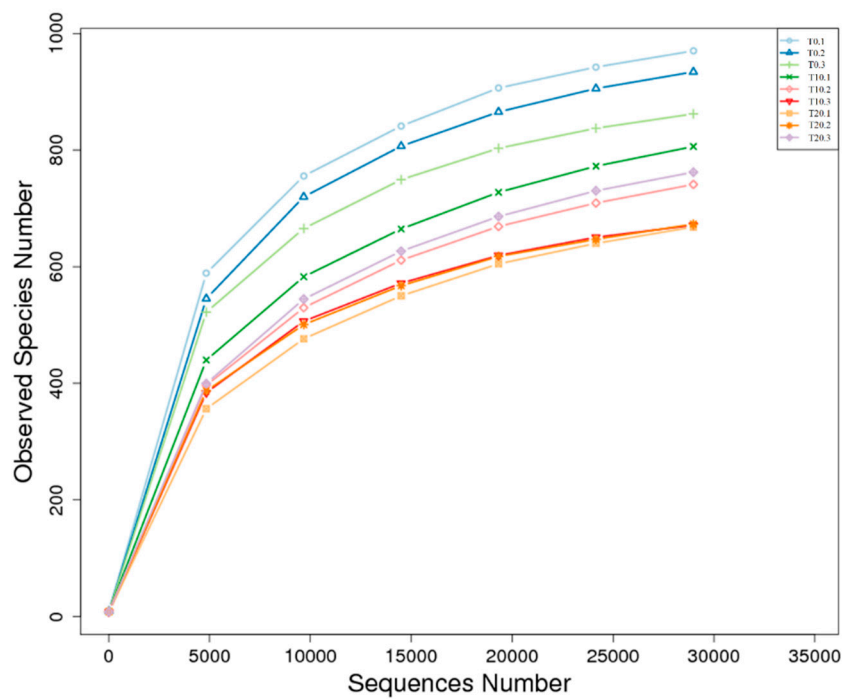

Figure S3. Rarefaction curves of all samples.
